# Supplementary material for: Genome and Transcriptome of Clostridium phytofermentans, Catalyst for the Direct Conversion of Plant Feedstocks to Fuels
Source: PLOS journal article supplement (doi:10.1371/journal.pone.0118285), 2015-06-02
Supplement: S1 (10.1371/journal.pone.0118285.s001) [file journal.pone.0118285.s001]

## **S1 File. Phages in *C. phytofermentans***

In order to determine whether the genome of *C. phytofermentans* contained evidence of phage infection, the sequences of all viruses (including phages) sequenced as of October 10, 2011, were downloaded from NCBI (<ftp://ftp.ncbi.nih.gov/genomes/Viruses/>) and used to search the predicted ORFs of *C. phytofermentans* for phage proteins using BLASTP. Two putative prophage-encoding clusters were identified, Cphy\_0782-0798 and Cphy\_2944-2997 (described in Table A). Both clusters contain genes for phage head and tail structural components, the majority of which, are homologous to those of *Clostridium difficile* phage  $\Phi$ C2 (Goh et al. 2007). We were unable to identify homologs of many phage genes required for the completion of the phage lifecycle (genes involved in DNA packaging, tail assembly, cell lysis, and lysogeny control as well as DNA replication, recombination, and modification). This result suggests that these phages may no longer actively infect *C. phytofermentans*. Examination of the microarray data revealed differential transcription of the Cphy\_0782-0798 cluster. It was upregulated during growth on cellulose, pectin and *Brachypodium distachyon* (relative to growth on glucose). In summary, the genome of *C. phytofermentans* encodes two clusters enriched in phage proteins, but it is not known whether these encoded phages are still active or affect the growth of the organism.

**Table A. Prophage-like genes of *C. phytofermentans*.**

| Protein ID       | Annotation                           | Homolog (Phage, e-value) <sup>a</sup>                                                    |
|------------------|--------------------------------------|------------------------------------------------------------------------------------------|
| <b>Cphy_0782</b> | XRE family transcriptional regulator | putative S24-like peptidase ( <i>Geobacillus</i> virus E2, 1e-14)                        |
| <b>Cphy_0783</b> | hypothetical protein Cphy_0783       | Gp2.21 ( <i>Bacillus</i> phage SPO1, 0.019)                                              |
| <b>Cphy_0784</b> | hypothetical protein Cphy_0784       | hypothetical protein phiC2p12 ( <i>Clostridium</i> phage phiC2, 3e-06)                   |
| <b>Cphy_0785</b> | phage protein                        | putative sheath tail protein ( <i>Clostridium</i> phage phiC2, 4e-118)                   |
| <b>Cphy_0786</b> | phage protein                        | putative core tail ( <i>Clostridium</i> phage phiC2, 7e-42)                              |
| <b>Cphy_0787</b> | XkdN-like protein                    | XkdN-like protein ( <i>Clostridium</i> phage phiC2, 3e-21)                               |
| <b>Cphy_0788</b> | phage tape measure protein           | putative tail tape measure protein ( <i>Clostridium</i> phage phiC2, 7e-79)              |
| <b>Cphy_0789</b> | peptidoglycan-binding LysM           | putative LysM ( <i>Clostridium</i> phage phiC2, 2e-27)                                   |
| <b>Cphy_0790</b> | putative phage cell wall hydrolase   | putative hydrolase ( <i>Clostridium</i> phage phiC2, 1e-66)                              |
| <b>Cphy_0791</b> | hypothetical protein Cphy_0791       | hypothetical protein phiC2p23 ( <i>Clostridium</i> phage phiC2, 3e-09)                   |
| <b>Cphy_0792</b> | phage protein                        | hypothetical protein EJ-1p60 ( <i>Streptococcus</i> phage EJ-1, 7e-19)                   |
| <b>Cphy_0793</b> | putative phage tail protein          | hypothetical protein phiC2p25 ( <i>Clostridium</i> phage phiC2, 1e-89)                   |
| <b>Cphy_0794</b> | hypothetical protein Cphy_0794       | hypothetical protein phiC2p26 ( <i>Clostridium</i> phage phiC2, 6e-18)                   |
| <b>Cphy_0795</b> | hypothetical protein Cphy_0795       | hypothetical protein BC2598 ( <i>Bacillus</i> phage phBC6A52, 0.086)                     |
| <b>Cphy_0796</b> | hypothetical protein Cphy_0796       | nd                                                                                       |
| <b>Cphy_0797</b> | hypothetical protein Cphy_0797       | nd                                                                                       |
| <b>Cphy_0798</b> | toxin secretion/phage lysis holin    | Putative lysis protein ( <i>Bacillus</i> virus 1, 9e-11)                                 |
| <b>Cphy_2944</b> | hypothetical protein Cphy_2944       | NLP/P60 family protein, enterotoxin ( <i>Clostridium perfringens</i> SM101 phage, 6e-07) |
| <b>Cphy_2945</b> | toxin secretion/phage lysis holin    | holin ( <i>Bacillus</i> phage Fah, 9e-24)                                                |

| Protein ID       | Annotation                         | Homolog (Phage, e-value) <sup>a</sup>                                                  |
|------------------|------------------------------------|----------------------------------------------------------------------------------------|
| <b>Cphy_2946</b> | hypothetical protein Cphy_2946     | nd                                                                                     |
| <b>Cphy_2947</b> | hypothetical protein Cphy_2947     | nd                                                                                     |
| <b>Cphy_2948</b> | hypothetical protein Cphy_2948     | gp4 ( <i>Mycobacterium</i> phage Bxz2, 0.012)                                          |
| <b>Cphy_2949</b> | hypothetical protein Cphy_2949     | hypothetical protein phiC2p26 ( <i>Clostridium</i> phage phiC2, 4e-18)                 |
| <b>Cphy_2950</b> | baseplate J family protein         | hypothetical protein phiC2p25 ( <i>Clostridium</i> phage phiC2, 5e-90)                 |
| <b>Cphy_2951</b> | phage protein                      | hypothetical protein EJ-1p60 ( <i>Streptococcus</i> phage EJ-1, 1e-17)                 |
| <b>Cphy_2952</b> | hypothetical protein Cphy_2952     | hypothetical protein phiC2p23 ( <i>Clostridium</i> phage phiC2, 1e-13)                 |
| <b>Cphy_2953</b> | putative phage cell wall hydrolase | putative hydrolase ( <i>Clostridium</i> phage phiC2, 8e-61)                            |
| <b>Cphy_2954</b> | peptidoglycan-binding LysM         | putative LysM ( <i>Clostridium</i> phage phiC2, 2e-31)                                 |
| <b>Cphy_2955</b> | hypothetical protein Cphy_2955     | putative tail tape measure protein ( <i>Clostridium</i> phage phiC2, 8e-43)            |
| <b>Cphy_2956</b> | XkdN-like protein                  | hypothetical protein phiC2p16 ( <i>Clostridium</i> phage phiC2, 1e-24)                 |
| <b>Cphy_2957</b> | phage protein                      | putative core tail ( <i>Clostridium</i> phage phiC2, 3e-56)                            |
| <b>Cphy_2958</b> | phage protein                      | putative sheath tail protein ( <i>Clostridium</i> phage phiC2, 1E-143)                 |
| <b>Cphy_2959</b> | hypothetical protein Cphy_2959     | nd                                                                                     |
| <b>Cphy_2960</b> | phage protein                      | hypothetical protein phiC2p12 ( <i>Clostridium</i> phage phiC2, 5e-28)                 |
| <b>Cphy_2961</b> | phage protein                      | hypothetical protein phiC2p11 ( <i>Clostridium</i> phage phiC2, 3e-32)                 |
| <b>Cphy_2962</b> | phage protein                      | hypothetical protein phiC2p10 ( <i>Clostridium</i> phage phiC2, 1e-26)                 |
| <b>Cphy_2963</b> | hypothetical protein Cphy_2963     | hypothetical protein LJ771_034 ( <i>Lactobacillus johnsonii</i> prophage Lj771, 8e-04) |
| <b>Cphy_2964</b> | phage coat protein                 | coat protein ( <i>Enterococcus</i> phage phiFL3A, 1e-90)                               |
| <b>Cphy_2965</b> | hypothetical protein Cphy_2965     | scaffold protein ( <i>Enterococcus</i> phage phiFL3A, 4e-21)                           |
| <b>Cphy_2966</b> | hypothetical protein Cphy_2966     | hypothetical protein lb338_phage_74 ( <i>Lactobacillus</i> phage Lb338-1 ,7e-24)       |

| Protein ID       | Annotation                                   | Homolog (Phage, e-value) <sup>a</sup>                                                 |
|------------------|----------------------------------------------|---------------------------------------------------------------------------------------|
| <b>Cphy_2967</b> | hypothetical protein Cphy_2967               | nd                                                                                    |
| <b>Cphy_2968</b> | hypothetical protein Cphy_2968               | hypothetical protein phiC2p05 ( <i>Clostridium</i> phage phiC2, 8e-06)                |
| <b>Cphy_2969</b> | SPP1 family phage head morphogenesis protein | putative head morphogenesis protein ( <i>Clostridium</i> phage phiC2, 3e-132)         |
| <b>Cphy_2970</b> | SPP1 family phage portal protein             | putative portal protein ( <i>Clostridium</i> phage phiC2, 1e-103)                     |
| <b>Cphy_2971</b> | phage uncharacterized protein                | TerL ( <i>Lactococcus</i> phage TP901-1, 9e-151)                                      |
| <b>Cphy_2972</b> | hypothetical protein Cphy_2972               | hypothetical protein Tuc2009_28 ( <i>Lactococcus</i> phage Tuc2009, 2e-43)            |
| <b>Cphy_2973</b> | hypothetical protein Cphy_2973               | nd                                                                                    |
| <b>Cphy_2974</b> | hypothetical protein Cphy_2974               | hypothetical protein CST121 ( <i>Clostridium</i> phage c-st, 5e-05)                   |
| <b>Cphy_2975</b> | hypothetical protein Cphy_2975               | nd                                                                                    |
| <b>Cphy_2976</b> | hypothetical protein Cphy_2976               | nd                                                                                    |
| <b>Cphy_2977</b> | hypothetical protein Cphy_2977               | 77ORF009 ( <i>Staphylococcus</i> phage 77, 3e-10)                                     |
| <b>Cphy_2978</b> | hypothetical protein Cphy_2978               |                                                                                       |
| <b>Cphy_2979</b> | transcriptional regulator, CdaR              | putative bacteriophage regulatory protein; Lambda gpCro analog (Phage Gifsy-2, 0.067) |
| <b>Cphy_2980</b> | hypothetical protein Cphy_2980               | polyprotein precursor (GB virus A ,0.099)                                             |
| <b>Cphy_2981</b> | hypothetical protein Cphy_2981               | nd                                                                                    |
| <b>Cphy_2982</b> | hypothetical protein Cphy_2982               | nd                                                                                    |
| <b>Cphy_2983</b> | hypothetical protein Cphy_2983               | nd                                                                                    |
| <b>Cphy_2984</b> | superfamily II helicase                      | ORF001 ( <i>Staphylococcus</i> phage PT1028, 3e-17)                                   |
| <b>Cphy_2985</b> | zinc finger CHC2-family protein              | primase (Abalone shriveling syndrome-associated virus, 0.008)                         |
| <b>Cphy_2986</b> | hypothetical protein Cphy_2986               | nd                                                                                    |
| <b>Cphy_2987</b> | single-strand binding protein                | SSB ( <i>Lactococcus</i> phage bIL286, 6e-25)                                         |

| Protein ID       | Annotation                                 | Homolog (Phage, e-value) <sup>a</sup>                                                |
|------------------|--------------------------------------------|--------------------------------------------------------------------------------------|
| <b>Cphy_2988</b> | hypothetical protein Cphy_2988             | gp70 ( <i>Mycobacterium</i> phage 244, 7e-30)                                        |
| <b>Cphy_2989</b> | hypothetical protein Cphy_2989             | hypothetical protein phi105_44 ( <i>Bacillus</i> phage phi105, 2e-04)                |
| <b>Cphy_2990</b> | hypothetical protein Cphy_2990             | gp53 ( <i>Listeria</i> phage P35, 1e-39)                                             |
| <b>Cphy_2991</b> | metal dependent phosphohydrolase           | nd                                                                                   |
| <b>Cphy_2992</b> | AbrB family transcriptional regulator      | Transcription state regulatory protein abrB ( <i>Bacillus</i> phage phBC6A51, 4e-14) |
| <b>Cphy_2993</b> | putative phage-related DNA binding protein | ORF032 ( <i>Staphylococcus</i> phage X2, 4e-10)                                      |
| <b>Cphy_2994</b> | XRE family transcriptional regulator       | putative S24-like peptidase ( <i>Geobacillus</i> virus E2, 1e-12)                    |
| <b>Cphy_2995</b> | hypothetical protein Cphy_2995             | hypothetical protein phiETA3_gp05 ( <i>Staphylococcus</i> phage phiETA3, 0.004)      |
| <b>Cphy_2996</b> | hypothetical protein Cphy_2996             | nd                                                                                   |
| <b>Cphy_2997</b> | resolvase domain-containing protein        | putative phage site-specific recombinase ( <i>Clostridium</i> phage phiCD27, 2e-78)  |

<sup>a</sup> nd indicates not detected.

### References:

Goh S, Ong P, Song K, Riley T, Chang B. 2007. The complete genome sequence of *Clostridium difficile* phage phiC2 and comparisons to phiCD119 and inducible prophages of CD630. Microbiology (Reading, England). 153:676–685.
